# Supplementary material
Source: Springer Nature journal article supplement (https://www.springermedizin.de/resource/supplementary/12879_2012_2333_MOESM2_ESM.pdf/9444362)
Supplement: MOESM2 [file 9444362]

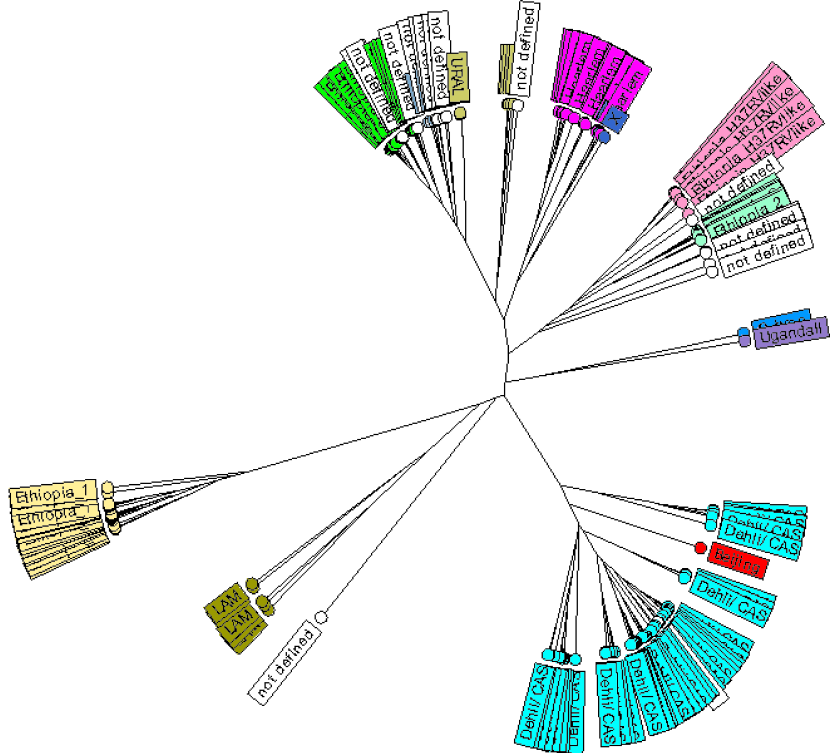

0.1

Lineage

|         |             |            |            |            |                    |
|---------|-------------|------------|------------|------------|--------------------|
| Beijing | Dehli/ CAS  | Ethiopia_1 | Ethiopia_2 | Ethiopia_3 | Ethiopia_H37R/like |
| Haarlem | LAM         | S type     | TUR        | URAL       | Ugandall           |
| X       | not defined |            |            |            |                    |
